# Supplementary material
Source: HighWire-hosted journal article supplement (https://openres.ersjournals.com/content/9/2/00641-2022)

## Supplementary data

### Search strategy

1. exp heart ventricle function/
2. ventricular dilation.mp. or exp ventricular dilatation/
3. pulmonary hypertension or exp pulmonary hypertension/
4. exp tricuspid annular plane systolic excursion/
5. septal motion.mp.
6. paradoxal septal motion.mp.
7. paradoxical septal motion.mp.
8. echocardiography.mp. or exp.echocardiography/
9. Exp heart right ventricular failure/
10. 2 or 3 or 4 or 5 or 7 or 8 or 9
11. Pulmonary embolism.mp. or exp lung embolism/
12. 10 and 11

### Statistical analysis

We determined Risk Ratio (RR), 95% CI for all-cause short-term death in patients with RVD as assessed at echocardiography. Prediction intervals have been also calculated [14]. Data from individual studies were pooled using the Mantel-Haenszel method; we reported results according to a fixed-effects model in the absence of significant heterogeneity and to a random-effects model in the presence of significant heterogeneity [14,15]. In case data for a meta-analysis of proportions were not available, a meta-analysis of effect size was performed. We calculated the summary ORs with 95% CI from ORs or HRs extracted from the study or calculated as crude ORs from rates. Unadjusted ORs and HRs were considered for the meta-analysis and analyzed together, due to the short-term follow-up (in-hospital or  $\leq 30$  days) [16].

Funnel plots were used to assess for publication bias.



**Supplementary Table 1.** Characteristics of studies reporting on RVD and included in the critical review. \*= mean and standard deviation or median and range. D: days; OBP: observational prospective; OBR: retrospective; NR: not reported; y: yes; Unstable: hemodynamic instability; Pts: patients; RVD: right ventricular dysfunction as comprehensive definition. sPAP: systolic pulmonary artery pressure; RV/LV ratio: right ventricle/left ventricle diameter ratio; TAPSE: Tricuspid Annular Plane Systolic Excursion; PE: pulmonary embolism; ICU: intensive care unit; CCUS: complete compression ultrasonography; cTnl: cardiac troponin I; TTE: transthoracic echocardiography; MDCT: multi-detector CT; MPA: main pulmonary artery; RVPO: right ventricular pressure overload; ESC: European Society of Cardiology; BNP: brain peptide natriuretic peptide; RHT: right heart thrombus; AF: atrial fibrillation; HsTnt: high-sensitive troponin T.

| Study                 | Design | Follow up   | Pts. (N) | Age*       | Male % | Un-stable | RVD % | Objective                                                                                                           | RVD definition                                                                                                                                                                                                             |
|-----------------------|--------|-------------|----------|------------|--------|-----------|-------|---------------------------------------------------------------------------------------------------------------------|----------------------------------------------------------------------------------------------------------------------------------------------------------------------------------------------------------------------------|
| <b>Ozsu 2010</b>      | OBP    | 30d         | 108      | 70 (21-90) | 44     | no        | 40    | I) to define low risk patients in an outpatient setting. II) to define high risk patients                           | end-diastolic RV/LV, end-diastolic RV diameter or sPAP (calculated by using the maximal velocity of tricuspid regurgitation)                                                                                               |
| <b>Bahloul 2019</b>   | OBP    | In-hospital | 75       | 53 (18)    | 83     | y         | 45    | to evaluate the rate and the outcome of PE in the ICU                                                               | RV dilatation or hypokinesia or abnormal movement of the interventricular septum with or without tricuspid regurgitation                                                                                                   |
| <b>Jimenez 2011</b>   | OBP    | 30d         | 591      | 74 (65-82) | 43     | no        | 20    | to assess if a combined strategy with lower CCUS, cTnl, and TTE might offer an advantage in risk stratification     | RV dilatation, hypokinesia of the RV free wall, or tricuspid systolic velocity greater than 2.6 m/s from the apical or subcostal four-chamber view                                                                         |
| <b>Becattini 2011</b> | OBP    | In-hospital | 460      | 67 (16)    | 46     | y         | 50    | To identify a criterion for RV dysfunction at MDCT and to evaluate its prognostic value                             | at least two among: RV/LV >0.9 in the apical four-chamber view, or RV/LV >0.7 in the parasternal long-axis or subcostal four-chamber views, or paradoxical interventricular septal motion, or sPAP over 30 mmHg            |
| <b>Vanni 2011</b>     | OBR    | In-hospital | 160      | 70 (15)    | 42     | Y         | 56    | To assess the association between plasma lactate concentration and in-hospital mortality in patients with acute PE. | One of the following: 1) RV dilatation; 2) paradoxical septal systolic motion, or 3) pulmonary hypertension (Doppler pulmonary acceleration time < 90 msec or presence of a right ventricle / atrial gradient > 30 mm Hg). |

|                       |     |             |      |            |    |    |    |                                                                                                                                      |                                                                                                                                                                                                                                                                                                               |
|-----------------------|-----|-------------|------|------------|----|----|----|--------------------------------------------------------------------------------------------------------------------------------------|---------------------------------------------------------------------------------------------------------------------------------------------------------------------------------------------------------------------------------------------------------------------------------------------------------------|
| <b>Vanni 2015</b>     | OBP | 30d         | 496  | 69<br>(16) | 49 | no | 40 | To determine the role of plasma lactate levels in risk assessment of normotensive patients with acute PE                             | At least one of the following: 1) RV dilatation (end-diastolic diameter >30 mm or RV/ LV end-diastolic diameter ratio $\geq 1$ in apical four-chamber view); (2) pulmonary hypertension (estimated RV-right atrial trans-tricuspidal gradient over 30 mm Hg); (3) hypokinesis of the RV free wall (any view). |
| <b>Vanni 2009</b>     | OBP | In-hospital | 386  | 67<br>(16) | 40 | no | 52 | To investigate the prognostic value of electrocardiography alone or in combination with echocardiography in normotensive PE patients | At least one of the following: RV dilatation (end-diastolic diameter >30 mm or RV/LV >1 in apical 4-chamber view); paradoxical septal systolic motion; and/or pulmonary hypertension (Doppler pulmonary acceleration time <90 ms or presence of a right ventricular/atrial gradient >30 mm Hg)                |
| <b>Grifoni 2000</b>   | OBP | In-hospital | 209  | 65<br>(15) | 60 | y  | 53 | To evaluate the prevalence and short-term prognosis of patients with PE                                                              | One of the following: RV dilatation, systolic flattening of the interventricular septum, and Doppler evidence of pulmonary hypertension.                                                                                                                                                                      |
| <b>Becattini 2013</b> | OBP | In-hospital | 1106 | 68<br>(15) | 45 | y  | 68 | To validate a model for risk stratification                                                                                          | Two of the following: (1) RV/LV > 1 in apical four-chamber view, (2) RV/LV 0.6 in parasternal long-axis or subcostal four-chamber view, and (3) right ventricular-to-right atrial pressure gradient > 30 mm Hg.                                                                                               |
| <b>Zhu 2008</b>       | OBP | 14d         | 520  | 57<br>(14) | 62 | no | 48 | To assess RVD for prognosis in PE patients identifying optimal echocardiographic indexes                                             | at least two of the following. (1) RV dilatation: RV/LV the parasternal long-axis view >0.6 or RV/LV>1.0; (2) RV hypokinesis; (3) loss of inspiratory collapse of IVC; (4) tricuspid regurgitant jet velocity >2.8 m/s.                                                                                       |
| <b>Krüger 2004</b>    | OBP | In-hospital | 50   | 62(16)     | 72 | y  | 62 | To determine how BNP levels are affected by PE with and without RVD                                                                  | Presence of any: 1) dilation of the RV (diastolic diameter >30 mm) or a RV/LV >1 in the 4-chamber view; 2) hypokinesis of the RV; 3) abnormal motion of the interventricular septum; or 4) tricuspid valve regurgitation (jet velocity >2.5 m/s).                                                             |
| <b>Post 2009</b>      | OBP | 14d         | 192  | 57<br>(17) | 47 | y  | 74 | To evaluate the local therapy regimen                                                                                                | RV dilatation, RV hypokinesis in the apical or subcostal view and/or the presence of paradoxical                                                                                                                                                                                                              |

|                      |     |             |     |               |    |    |    |                                                                                                                                         |                                                                                                                                                                                                                                                                                                                 |
|----------------------|-----|-------------|-----|---------------|----|----|----|-----------------------------------------------------------------------------------------------------------------------------------------|-----------------------------------------------------------------------------------------------------------------------------------------------------------------------------------------------------------------------------------------------------------------------------------------------------------------|
|                      |     |             |     |               |    |    |    |                                                                                                                                         | septal wall motion or a newly developed tricuspid regurgitation                                                                                                                                                                                                                                                 |
| <b>George 2014</b>   | OBR | 30d         | 785 | 58.4<br>(17)  | 62 | NR | 44 | To compare the prognostic significance of CT-derived RV/LV and TTE detection of RV strain in patients with PE                           | Any of following: 1) reduced RV systolic function assessed qualitatively on the basis of the RV free wall motion or presence of RV hypokinesia/dyskinesia/ akinesia; (2) sPAP >36mm Hg; (3) moderate or severe dilatation of the RV determined qualitatively; and (4) abnormal interventricular septal movement |
| <b>Kumamaru 2016</b> | OBR | 14d         | 236 | 54.8<br>(17)  | 38 | Y  | 22 | To develop a clinical prediction rule to identify the subpopulation for which CT-derived data can be used to predict normal RV function | Any of the following: (1) reduced RV systolic function assessed qualitatively based on the RV wall motion; (2) RV hypokinesia/dyskinesia/akinesia; (3) sPAP>36 mmHg; (4) moderate or severe dilatation of RV; and (5) abnormal interventricular septal movement.                                                |
| <b>Lankeit 2010</b>  | OBP | 30d         | 156 | 67<br>(53–75) | 45 | no | 45 | To assess the role of cardiac cTnT levels using hsTnT in risk assessment                                                                | dilatation of the RV in the absence of left ventricular or mitral valve disease                                                                                                                                                                                                                                 |
| <b>Weekes 2017</b>   | OBP | 30d         | 116 | 59<br>(26)    | 59 | no | 22 | To assess early use of POC RVD testing to accurately identify RVD in PE patients                                                        | Blunt RV apex; basal RV diameter > 3.8 cm; RV > LV; Minimal to absent movement of RV free wall annulus (tricuspid annular plane systolic excursion < 1.0 cm) and diminished inward movement of RV free wall (fractional change < 18%); Flattened or bowed toward LV.                                            |
| <b>Binder 2005</b>   | OBP | In-hospital | 124 | 60<br>(18)    | 40 | y  | 27 | To investigate whether the combination of NT-proBNP with imaging increase the prognostic value of either method alone                   | RV dilatation (end-diastolic diameter >30 mm from the parasternal view or the RV appearing larger than the LV from the subcostal or apical view) combined with right atrial hypertension, ie, absence of inspiratory collapse of the inferior vena cava.                                                        |
| <b>Taylor 2013</b>   | OBR | In-hospital | 161 | 60<br>(18)    | 46 | y  | 24 | To assess the prognostic value of POC for PE patients in hospital adverse events                                                        | RV/LV of $\geq 1$ by qualitative estimate, RV hypokinesia, or a McConnell's sign. RVS was determined by the initial consciousness, lethargy, or delirium.                                                                                                                                                       |

|                       |     |             |     |            |    |    |    |                                                                                                                                 |                                                                                                                                                                                                                                                                                               |
|-----------------------|-----|-------------|-----|------------|----|----|----|---------------------------------------------------------------------------------------------------------------------------------|-----------------------------------------------------------------------------------------------------------------------------------------------------------------------------------------------------------------------------------------------------------------------------------------------|
| <b>Dudzinski 2016</b> | OBP | 5d          | 104 | 58 (17)    | 52 | y  | 40 | To test the hypothesis that CT provides information on RV analogous to TTE                                                      | presence of either RV hypokinesis, RV dilatation, or interventricular septal bowing in concordance with American Society of Echocardiography guidelines                                                                                                                                       |
| <b>Ohigashi 2010</b>  | OBR | In-hospital | 50  | 66 (54-78) | 58 | y  | 64 | To evaluate the usefulness of biomarkers for the diagnosis of RVD                                                               | RV dilatation >30 or RV/LV>1 or RV hypokinesis or paradoxical septal motion or sPAP>30 mmHg                                                                                                                                                                                                   |
| <b>Zhu 2007</b>       | OBP | 14d         | 90  | 56.8 (14)  | 57 | y  | 56 | to assess 14-day adverse events in combined RVD at TTE and cTnl                                                                 | At least 2 of the following: RV dilatation (without hypertrophy), loss of inspiratory collapse of inferior vena cava (IVC), RV hypokinesis, tricuspid regurgitant jet velocity > 2.8 m/s                                                                                                      |
| <b>Dellas 2010</b>    | OBP | 30d         | 126 | 67 (51-74) | NR | no | 39 | To determine H-FABP, alone or in combination with clinical or echocardiographic findings, might reliably predict poor prognosis | RV dilation (end-diastolic diameter >30 mm from the parasternal view or a RV/LV diameter ratio >1.0 from the subcostal or apical views), combined with right atrial hypertension (absence of the inspiratory collapse of the inferior vena cava) in the absence of LV or mitral valve disease |
| <b>Kaeberich 2015</b> | OBP | 30d         | 588 | NR         | NR | no | 37 | Optimised cut-off values for hsTnT and adjustment for age might provide superior prognostic value                               | RV dilatation combined with right atrial hypertension (absence of the inspiratory collapse of the inferior vena cava)                                                                                                                                                                         |
| <b>Lankeit 2008</b>   | OBP | 30d         | 112 | 68 (55-76) | 42 | y  | 42 | GDF-15 levels on admission to identify serious complications during the acute or long-term phase of PE                          | RV dilatation (end-diastolic diameter > 30 mm from the parasternal view, or a RV/LV > 1.0 from the subcostal or apical views), combined with right atrial hypertension (absence of the inspiratory collapse of the inferior vena cava)                                                        |
| <b>Keller 2019</b>    | OBP | 30d         | 511 | 69 (54-77) | 44 | y  | 51 | To investigate the impact of symptoms and initial presentation on treatment and outcome                                         | RV dilatation (RV/LV) or end-diastolic RV diameter>30mm combined with absence of the inspiratory collapse of the inferior vena cava on TTE                                                                                                                                                    |
| <b>Beigel 2019</b>    | OBR | In-hospital | 179 | 66 (16)    | 47 | no | 66 | To evaluate a cohort of intermediate-risk PE patients with evidence of RV involvement, to                                       | One of the following: a) an increased RV/LV ratio; b) an enlarged RV diameter of >35mm at the mid-ventricular level or >41mm at the base of the RV; or c) RV contractile dysfunction                                                                                                          |

|                        |     |             |     |            |    |    |    |                                                                                                                                                  |                                                                                                                                                                                                                   |
|------------------------|-----|-------------|-----|------------|----|----|----|--------------------------------------------------------------------------------------------------------------------------------------------------|-------------------------------------------------------------------------------------------------------------------------------------------------------------------------------------------------------------------|
|                        |     |             |     |            |    |    |    | identify poor outcomes                                                                                                                           |                                                                                                                                                                                                                   |
| <b>Pruszczyk 2020</b>  | OBP | 30d         | 490 | 64 (18)    | 53 | no | 12 | to compare echocardiographic parameters for the prediction of adverse 30-day outcome                                                             | TAPSE<16 mm and RV/LV <1                                                                                                                                                                                          |
| <b>Vanni 2017</b>      | OBR | 30d         | 994 | 74 (64-81) | 50 | no | 29 | to compare the efficiency of the 2014 ESC model, Bova and TELOS scores                                                                           | At least one of the following: (1) RV dilatation (end-diastolic diameter); (2) sPAP >30 mmHg); and (3) hypokinesis of the RV-free wall (any view).                                                                |
| <b>Witkin 2019</b>     | OBR | 7d          | 326 | NR         | NR | NR | 45 | To assess mortality and need for intensive therapies in patients with PE who had TTE evidence of chronic RVPO than patients without chronic RVPO | RV dilatation, hypokinesis or septal bowing or flattening without fulfilling the criteria for chronic RVPO                                                                                                        |
| <b>Ribeiro 1997</b>    | OBP | In-hospital | 126 | NR         | 56 | y  | 55 | To evaluate if the degree of systolic RVD is a predictor of mortality during hospitalization                                                     | RV systolic dysfunction was assessed by qualitative evaluation of the RV wall motion; tricuspid regurgitation was assessed qualitatively; A normal PASP was defined as <30 mmHg                                   |
| <b>Palmieri 2008</b>   | NR  | In-hospital | 89  | NR         | NR | no | NR | increased cTnl and RVD had prognostic relevance in addition to a novel clinically based prognostic risk score                                    | RV dilatation associated with paradoxical interventricular septal motion, and with depressed RV systolic function either global (tricuspid annulus peak systolic excursion \15 mm) or segmental (basal segments)  |
| <b>Kostrubiec 2010</b> | OBP | 30d         | 212 | 64 ± 18    | 38 | y  | 58 | renal dysfunction as independent marker of early mortality in PE, and in addition to troponin-based risk stratification.                         | RV free wall hypokinesis and RV/LV > 0.9 in a four-chamber view, and/or (ii) an elevated tricuspid valve pressure gradient exceeding 30 mmHg with a shortened acceleration time of pulmonary ejection below 80 ms |
| <b>Pieralli 2006</b>   | OBP | In-hospital | 61  | 75 ± 14    | 26 | no | 57 | to investigate the value of BNP for the identification of RV                                                                                     | (1) RV dilation (end-diastolic diameter 30 mm or RV/LV in 4-chamber view), (2) RV free wall hypokinesia, (3) paradoxical septal systolic motion,                                                                  |

|                             |     |             |     |             |    |    |    |                                                                                                                                                                                |                                                                                                                                                                                                                                                        |
|-----------------------------|-----|-------------|-----|-------------|----|----|----|--------------------------------------------------------------------------------------------------------------------------------------------------------------------------------|--------------------------------------------------------------------------------------------------------------------------------------------------------------------------------------------------------------------------------------------------------|
|                             |     |             |     |             |    |    |    | dysfunction and its prognostic value                                                                                                                                           | and (4) pulmonary hypertension (Doppler pulmonary acceleration time 90 ms or the presence of a RV or right atrial gradient 30 mm Hg)                                                                                                                   |
| <b>Vieillard-Baron 1001</b> | OBR | In-hospital | 98  | NR          | NR | y  | NR | To examine the prevalence of acute cor pulmonale in PE, diagnosed on the basis of TTE criteria                                                                                 | Combining RV enlargement, as indicated with RV/LV end diastolic area with septal dyskinesia                                                                                                                                                            |
| <b>Barrios 2017</b>         | OBP | 30d         | 848 | 67.4 ± 16.7 | 49 | no | 23 | to evaluate the optimal approach to assess RV function in normotensive PE patients                                                                                             | Dilatation of the RV (end-diastolic diameter > 30 mm from the parasternal view or the RV larger than LV from the subcostal or apical view), hypokinesia of the RV free wall (any view), and estimated systolic pulmonary artery pressure over 30 mm Hg |
| <b>Yalamanchili 2004</b>    | OBR | In-hospital | 81  | NR          | NR | y  | 27 | To report in-hospital mortality in patients with PE with and without increased cardiac troponin I                                                                              | RV dilation (RV end-diastolic diameter 30 mm), hypokinesia, and paradoxical RV septal systolic motion                                                                                                                                                  |
| <b>Logeart 2007</b>         | OBP | In-hospital | 67  | 69 ± 15     | 56 | no | 54 | to compare the value of BNP and troponin as well as clinical and electrocardiographic characteristics for diagnosing RVD                                                       | RV/LV diameter ratio > 0.7, hypokinesia of the RV free wall, inferior cava vena diameter > 10 mm during inspiration, interventricular septum bulging in the LV, and tricuspid regurgitant jet velocity > 2.7 m/s.                                      |
| <b>Gallotta 2008</b>        | OBP | In-hospital | 90  | 67 ± 18     | 26 | no | 59 | To assess adverse outcomes in association with increased troponin I at admission independently of clinical, electrocardiographic, echocardiographic and laboratory information | any of the following findings: 1) paradoxical interventricular septal motion; 2) RV dilation (diastolic diameter >15 mm/m <sup>2</sup> ); 3) low RV systolic function (systolic excursion of the tricuspid anulus <15 mm)                              |



|                          |     |             |     |                 |    |    |    |                                                                                                                         |                                                                                                                                                                                                                                                                                                           |
|--------------------------|-----|-------------|-----|-----------------|----|----|----|-------------------------------------------------------------------------------------------------------------------------|-----------------------------------------------------------------------------------------------------------------------------------------------------------------------------------------------------------------------------------------------------------------------------------------------------------|
| <b>Samaranayake 2015</b> | NR  | 30d         | 61  | 63.1<br>(27–97) | 47 | no | 86 | to determine the rates and factors associated with the development of persistent RVD and/or PHT and all-cause mortality | main pulmonary artery (MPA) diameter >33 mm or MPA to aorta diameter ratio >1.1 and/or (ii) signs of RV dilatation or straightened or leftward bowed interventricular septum                                                                                                                              |
| <b>Jimenez 2014</b>      | OBP | 30d         | 848 | 72<br>(59–80)   | 49 | no | 23 | to derive a multimarker model for estimating risk in normotensive patients with PE.                                     | dilatation of the RV, hypokinesia of the RV free wall, and estimated systolic pulmonary artery pressure greater than 30 mm Hg                                                                                                                                                                             |
| <b>Kukla 2015</b>        | OBR | In-hospital | 975 | 65.8 (14)       | 41 | y  | 76 | to determine the prevalence of RHT and AF and to assess their impact on outcomes in PE patients                         | RV diameter >30 mm in the parasternal view or RV/LV ratio >1, acceleration time of RV ejection <90 ms or tricuspid insufficiency peak gradient >30 mm Hg without RV hypertrophy, paradoxical systolic movement of the septum, presence of hypokinesia or akinesia of the RV free wall, or presence of RHT |

**Supplementary Table 2.** Characteristics of studies reporting on RV/LV and included in the critical review. \*= mean and standard deviation or median and range. D: days; OBP: observational prospective; OBR: retrospective; NR: not reported; y: yes; Unstable: hemodynamic instability; Pts: patients; RVD: right ventricular dysfunction; RV/LV ratio: right ventricle/left ventricle diameter ratio; PE: pulmonary embolism; cTnl: cardiac troponin I; TTE: transthoracic echocardiography; MDCT: multi-detector CT; TAPSE: Tricuspid Annular Plane Systolic Excursion.

| Study                  | Design | Follow up   | Pts. (N) | Age*        | Male % | Unstable | Altered RV/LV % | RV/LV cut off | Objective                                                                                                                                                                      |
|------------------------|--------|-------------|----------|-------------|--------|----------|-----------------|---------------|--------------------------------------------------------------------------------------------------------------------------------------------------------------------------------|
| <b>Khemasuwan 2015</b> | OBR    | In-hospital | 211      | 61 (15)     | 49     | y        | 52              | ≥1            | To identify the most important echocardiographic parameters that predict adverse clinical outcomes in patients with acute PE.                                                  |
| <b>Zanobetti 2013</b>  | NR     | 30d         | 120      | 73 (14)     | 43     | y        | 50              | ≥1            | identify 1 or more ECG indices of RV anatomy and function predictors of short-term RV dysfunction in patients with PE                                                          |
| <b>Pruszczyk 2014</b>  | OBP    | In-hospital | 411      | 64 (18)     | 43     | no       | 29              | ≥1            | evaluate the prognostic value of echocardiographic indices of RVD for prediction of adverse clinical outcomes in initially normotensive patients with acute pulmonary embolism |
| <b>Ciurzyński 2018</b> | OBR    | 30d         | 400      | 66 (20-101) | 48     | no       | 36              | ≥1            | to analyses the prognostic value of a new echocardiographic parameter, TRPG/TAPSE, for prediction of adverse clinical outcomes in initially normotensive APE patients          |
| <b>Paczyńska 2015</b>  | OBP    | 30d         | 76       | 68 (19-94)  | 46     | no       | 39              | ≥1            | to compare right ventricular RV/LV measured by echocardiography and MDCT with TAPSE as a prognostic factor of APE-related 30-day mortality                                     |
| <b>Dahhdan 2016</b>    | OBR    | 30d         | 65       | 55 (43-72)  | 48     | y        | 14              | ≥1            | the addition of quantitative echocardiographic markers of RV function would add to clinical parameters to predict outcomes in patients with acute PE                           |
| <b>Stein 2010</b>      | OBR    | In-hospital | 900      | 65 (17)     | 64     | no       | 26              | >1            | to further assess in-hospital mortality of stable patients with PE who have RV enlargement and/or an increase of cTnl                                                          |
| <b>Frémont 2008</b>    | OBR    | In-hospital | 950      | 69 (14)     | 40     | y        | 28              | ≥0.6          | to determine whether that criterion had independent prognostic value and, if so, to determine the critical cutoff of the ratio with respect to predicting hospital mortality   |
| <b>Kanar 2019</b>      | OBR    | In-hospital | 142      | 56.9 (13)   | 58     | y        | 13              | >1            | was to evaluate RV mechanical functions and dyssynchrony and to consider their relationship with early hospital mortality in patients with APE                                 |
| <b>Zhu 2008</b>        | OBP    | 14d         | 520      | 57 (14.4)   | 62     | y        | NR              | 0.6           | To assess RVD for prognosis in PE patients identifying optimal echocardiographic indexes                                                                                       |
| <b>Sanchez 2010</b>    | OBP    | 30d         | 570      | 68 (52–     | 47     | y        | NR              | NR            | to assess the additional prognostic value of echocardiography and biomarkers for stratifying patients with PE in different risk categories                                     |

|                       |     |             |     |                   |    |    |    |      |                                                                                                                                                                                          |
|-----------------------|-----|-------------|-----|-------------------|----|----|----|------|------------------------------------------------------------------------------------------------------------------------------------------------------------------------------------------|
|                       |     |             |     | 77)               |    |    |    |      |                                                                                                                                                                                          |
| <b>Sanchez 2013</b>   | OBP | 30d         | 592 | 67<br>(52–<br>77) | 47 | no | NR | >0.9 | to determine whether the combination of echocardiography and biomarkers with the PESI improves the risk stratification of patients with PE compared with the PESI alone                  |
| <b>Pruszczyk 2003</b> | OBR | In-hospital | 64  | 61<br>(17)        | 53 | no | NR | NR   | We checked whether the detection of ongoing RV myocardial injury by the monitoring of cardiac troponin T (cTnT) levels might help in the risk stratification of patients with PE         |
| <b>Pruszczyk 2020</b> | OBP | 30d         | 490 | 64<br>(18)        | 53 | no | 36 | >1   | to compare echocardiographic parameters for the prediction of adverse 30-day outcome in normotensive patients with acute pulmonary embolism, and to develop an optimal definition of RVD |
| <b>Vanni 2011</b>     | OBR | In-hospital | 384 | 70<br>(15)        | 42 | y  | 43 | ≥1   | To assess the association between plasma lactate concentration and in-hospital mortality in patients with PE                                                                             |
| <b>Vanni 2015</b>     | OBP | 30d         | 496 | 69<br>(16)        | 49 | no | 41 | ≥1   | To determine the role of plasma lactate levels in the risk assessment of normotensive patients with acute PE                                                                             |

**Supplementary Table 3.** Characteristic of studies reporting on TAPSE and included in the critical review

\*= mean and standard deviation or median and range. D: days; OBP: observational prospective; OBR: retrospective; NR: not reported; y: yes; Unstable: hemodynamic instability; Pts: patients; RVD: right ventricular dysfunction; RV/LV ratio: right ventricle/left ventricle diameter ratio; PE: pulmonary embolism; MDCT: multi-detector CT; TAPSE: Tricuspid Annular Plane Systolic Excursion; LVOT VTI: left ventricular outflow tract velocity time; BUN: blood urea nitrogen.

| Study           | Design | Follow up   | P (N) | Age*        | Male (%) | Unstable | Altered TAPSE (%) | TAPSE cut off (mm) | Objective                                                                                                                                                                                  |
|-----------------|--------|-------------|-------|-------------|----------|----------|-------------------|--------------------|--------------------------------------------------------------------------------------------------------------------------------------------------------------------------------------------|
| Lobo 2014       | OBP    | 30d         | 782   | 73(59-80)   | 49       | no       | 45                | >20                | To establish the relationship between TAPSE and clinical outcomes in normotensive patients with acute symptomatic PE.                                                                      |
| Lobo 2014       | OBR    | 30d         | 1326  | 72 (58-80)  | 48       | no       | 46                | >20                | To establish the relationship between TAPSE and clinical outcomes in normotensive patients with acute symptomatic PE.                                                                      |
| Khemasuwan 2015 | OBR    | In-hospital | 211   | 61 (15)     | 49       | y        | 31                | ≥16                | To identify the most important echocardiographic parameters that predict adverse outcome in patients with acute PE.                                                                        |
| Zanobetti 2013  | NR     | 30d         | 120   | 73 (14)     | 43       | y        | 47                | ≥16                | To identify 1 or more ECG indices of RV anatomy and function predictors of short-term RV dysfunction in patients with PE                                                                   |
| Pruszczyk 2014  | OBP    | In-hospital | 411   | 64 (18)     | 43       | no       | 9                 | ≥16                | To evaluate the prognostic value of echocardiographic indices of right ventricular dysfunction (RVD) for adverse outcomes in initially normotensive patients with acute pulmonary embolism |
| Yuriditsky 2019 | OBR    | In-hospital | 188   | 57 (17)     | 49       | y        | 20                | ≥16                | To determine the association between LVOT VTI and in-hospital mortality or adverse outcomes                                                                                                |
| Ciurzyński 2018 | OBR    | 30d         | 400   | 66 (20-101) | 48       | no       | 12                | ≥15                | To analyses the prognostic value of a new echocardiographic parameter, TRPG/ TAPSE, for prediction of adverse outcomes in initially normotensive APE patients                              |
| Paczyńska 2015  | OBP    | 30d         | 76    | 68 (19-94)  | 46       | no       | 17.1              | ≥15                | To compare RV/LV measured by echocardiography and multidetector computed tomography (MDCT) with TAPSE as a prognostic factor of APE-related 30-day mortality                               |
| Dahhdan 2016    | OBR    | 30d         | 65    | 55 (43-72)  | 48       | y        | 20                | ≥16                | The addition of quantitative echocardiographic markers of RV function would add to clinical parameters to predict outcomes in patients with acute PE                                       |
| Tatlisu 2017    | OBR    | In-hospital | 252   | 64 (15)     | 47       | y        | 37.6              | ≤15                | To investigate the association of BUN levels with in-hospital and long-term adverse clinical outcomes in APE patients treated with the tissue plasminogen activator                        |
| Carroll 2018    | OBR    | In-hospital | 455   | 63 (16)     | 47       | y        | 27                | <16                | to determine the potential additive value of multiple parameters of RV strain and to evaluate the association of each individual parameter with adverse events in acute PE                 |
| Lee 2019        | OBP    | In-hospital | 144   | 56 (17)     | 50       | no       | NR                | NR                 | We aimed to evaluate the prognostic value of echocardiographic measurements of RV systolic function for clinical outcomes in patients with acute non-massive PE.                           |

|                           |     |                 |     |              |    |    |    |     |                                                                                                                                                                                          |
|---------------------------|-----|-----------------|-----|--------------|----|----|----|-----|------------------------------------------------------------------------------------------------------------------------------------------------------------------------------------------|
| <b>Kanar<br/>2019</b>     | OBP | In-<br>hospital | 142 | 57<br>(13)   | 58 | y  | NR | NR  | To evaluate RV mechanical functions and dyssynchrony and to consider their relationship with early hospital mortality in patients with APE                                               |
| <b>Pruszczyk<br/>2020</b> | OBP | 30d             | 490 | 64<br>(18)   | 53 | no | 18 | <16 | to compare echocardiographic parameters for the prediction of adverse 30-day outcome in normotensive patients with acute pulmonary embolism, and to develop an optimal definition of RVD |
| <b>Oskan<br/>2021</b>     | OBR | In-<br>hospital | 635 | 62<br>(16.3) | 46 | NR | 31 | <16 | we aimed to compare the ECG and echocardiographic parameters between older and younger patients and to evaluate the predictors of in-hospital mortality among APE patients.              |

**Supplementary Table 4.** Characteristics of studies reporting on hypokinesis and included in the critical review

\*= mean and standard deviation or median and range. D: days; OBP: observational prospective; OBR: retrospective; NR: not reported; y: yes; Unstable: hemodynamic instability; Pts: patients; RVD: right ventricular dysfunction; RV/LV ratio: right ventricle/left ventricle diameter ratio; PE: pulmonary embolism; MDCT: multi-detector CT; TTE: transthoracic echocardiography.

| Study               | Design | Follow up   | Pts (N) | Age*         | Male (%) | Unstable | Hypokinesis (%) | Objective                                                                                                                                                                                                                                                         |
|---------------------|--------|-------------|---------|--------------|----------|----------|-----------------|-------------------------------------------------------------------------------------------------------------------------------------------------------------------------------------------------------------------------------------------------------------------|
| <b>Zhu 2008</b>     | OBP    | 14d         | 520     | 57 (14.4)    | 62.1     | no       | 78              | RVD for prognosis in APE patients identifying optimal echocardiographic indexes                                                                                                                                                                                   |
| <b>Bikdeli 2018</b> | OBP    | 30d         | 15375   | 65.9 (17.2)  | 46       | y        | 23              | to report the real-world use and predictors of early TTE (within the first 72 hours from diagnosis) in patients with PE, and to explore the association between some of the main TTE findings and 30-day PE-related mortality in unadjusted and adjusted analyses |
| <b>Kucher 2005</b>  | OBP    | 30d         | 1035    | 67 (21-91)   | 44.1     | No       | 42              | we investigated whether echocardiographic RV hypokinesis helps predict early death in the large group of patients enrolled in the International Cooperative Pulmonary Embolism Registry (ICOPER) who presented with a preserved systemic arterial pressure        |
| <b>Dahhan 2016</b>  | OBR    | 30d         | 69      | 55 (43-72)   | 52       | y        | 45              | the addition of quantitative echocardiographic markers of RV function would add to clinical parameters to predict outcomes in patients with acute PE                                                                                                              |
| <b>Park 2012</b>    | OBR    | 30d         | 56      | 63.5 (52-71) | 50       | y        | 36              | we aimed to test the hypothesis that chest CT is a valuable rapid method of identifying RV dysfunction and predicting poor clinical outcomes, by comparing the two imaging methods in the same patients                                                           |
| <b>Carroll 2018</b> | OBR    | In-hospital | 455     | 63 (16.2)    | 47       | y        | 62              | to determine the potential additive value of multiple parameters of RV strain and to evaluate the association of each individual parameter with adverse events in acute PE                                                                                        |

**Supplementary Table 5.** Characteristics of studies reporting on McConnell’s sign and included in the critical review

\*= mean and standard deviation or median and range. RV: right ventricular dysfunction; D: days; OBP: observational prospective; OBR: retrospective; NR: not reported; y: yes; Unstable: hemodynamic instability; Pts: patients

| Study                  | Design | Follow up   | Pts (N) | Age*      | Male (%) | Unstable | McConnell’s sign (%) | Objective                                                                                                                                                                                                                    |
|------------------------|--------|-------------|---------|-----------|----------|----------|----------------------|------------------------------------------------------------------------------------------------------------------------------------------------------------------------------------------------------------------------------|
| <b>Pruszczyk 2014</b>  | OBP    | In-hospital | 411     | 64 (18)   | 43       | no       | 18                   | evaluate the prognostic value of echocardiographic indices of RVD prediction of pulmonary embolism–related 30-day mortality or need for rescue thrombolysis in initially normotensive patients with acute pulmonary embolism |
| <b>Carroll 2018</b>    | OBR    | In-hospital | 455     | 63 (16.2) | 47       | y        | 14                   | to determine the potential additive value of multiple parameters of RV strain and to evaluate the association of each individual parameter with adverse events in acute PE                                                   |
| <b>Khemasuwan 2015</b> | OBR    | In-hospital | 211     | 61 (15)   | 49       | y        | 14                   | To identify the most important echocardiographic parameters that predict medical ICU, hospital, and long-term mortality in patients with acute PE.                                                                           |
| <b>Zanobetti 2013</b>  | NR     | 30d         | 120     | 73 (14)   | 43       | y        | 39                   | identify 1 or more ECG indices of RV anatomy and function predictors of short-term RV dysfunction in patients with PE                                                                                                        |

**Supplementary Table 6.** Characteristics of studies reporting on sPAP and included in the critical review

\*= mean and standard deviation or median and range. RV: right ventricular dysfunction; D: days; OBP: observational prospective; OBR: retrospective; NR: not reported; y: yes; Unstable: hemodynamic instability; Pts: patients; sPAP: systolic pulmonary artery pressure

| Study                  | Design | Follow up   | Pts (N) | Age*      | Male % | Unstable | Increased PAPs % | PAPs cut off (mmHg) | Objective                                                                                                                                                                                                                |
|------------------------|--------|-------------|---------|-----------|--------|----------|------------------|---------------------|--------------------------------------------------------------------------------------------------------------------------------------------------------------------------------------------------------------------------|
| <b>Ribeiro 1997</b>    | OBP    | In-hospital | 126     | NR        | 56     | y        | 76               | ≤30                 | The degree of RV systolic dysfunction, as assessed by ED at the time of diagnosis of PE, is a predictor of mortality rate during hospitalization and within 1 year.                                                      |
| <b>Sukhija 2005</b>    | OBR    | In-hospital | 190     | 58 (15)   | 45     | y        | 34               | 50                  | The association of in-hospital mortality with different echocardiographic signs of RV dysfunction                                                                                                                        |
| <b>Tatlisu 2016</b>    | OBR    | In-hospital | 252     | 64(15)    | 47     | y        | NR               | NR                  | To investigate the association of BUN levels with in-hospital and long-term adverse clinical outcomes in APE patients treated with the tissue plasminogen activator                                                      |
| <b>Meneveau 2003</b>   | OBP    | In-hospital | 183     | 66 (14)   | 44     | y        | 74               | >30                 | To evaluate the in-hospital course and long-term evolution of patients with massive PE submitted to thrombolytic therapy, and to determine the independent predictors of short and long-term prognosis in these patients |
| <b>Khemasuwan 2015</b> | OBR    | In-hospital | 211     | 61 (15)   | 49     | y        | NR               | NR                  | To identify the most important echocardiographic parameters that predict medical ICU, hospital, and long-term mortality in patients with acute PE.                                                                       |
| <b>Kanar 2019</b>      | OBP    | In-hospital | 142     | 56.9 (13) | 58     | y        | NR               | NR                  | To evaluate RV mechanical functions and dyssynchrony and to consider their relationship with early hospital mortality in patients with APE                                                                               |



**Supplementary Table 7.** Characteristics of studies reporting on RV diameter and included in the critical review

\*= mean and standard deviation or median and range. RV: right ventricle dysfunction; D: days; OBP: observational prospective; OBR: retrospective; NR: not reported; y: yes; Unstable: hemodynamic instability; Pts: patients; TAPSE: Tricuspid Annular Plane Systolic Excursion; ED: echocardiography Doppler; ICU: intensive care unit.

| Study                 | Design | Follow up   | P (N) | Age*       | Male % | Unstable | Altered RV diameter % | RV diameter cut off (mm) | Objective                                                                                                                                                                                                                           |
|-----------------------|--------|-------------|-------|------------|--------|----------|-----------------------|--------------------------|-------------------------------------------------------------------------------------------------------------------------------------------------------------------------------------------------------------------------------------|
| <b>Pruszczyk 2014</b> | OBP    | In-hospital | 411   | 64 (18)    | 43     | no       | NR                    | NR                       | To evaluate the prognostic value of echocardiographic indices of RVD for prediction of pulmonary embolism-related 30-day mortality or need for rescue thrombolysis in initially normotensive patients with acute pulmonary embolism |
| <b>Sukhija 2005</b>   | OBR    | In-hospital | 190   | 58 (15)    | 45     | y        | 34                    | ≥4.5                     | The association of in-hospital mortality with different echocardiographic signs of RV dysfunction                                                                                                                                   |
| <b>Paczyńska 2015</b> | OBP    | 30d         | 76    | 68 (19-94) | 46     | no       | NR                    | NR                       | To compare RV/LV ratio measured by echocardiography and multidetector computed tomography (MDCT) with TAPSE as a prognostic factor of APE-related 30-day mortality                                                                  |
| <b>Meneveau 2003</b>  | OBP    | In-hospital | 183   | 66 (14)    | 44     | y        | 83                    | NR                       | To evaluate the in-hospital course and long-term evolution of patients with massive PE submitted to thrombolytic therapy, and to determine the independent predictors of short and long-term prognosis in these patients            |
| <b>Khemaswan 2015</b> | OBR    | In-hospital | 211   | 61 (15)    | 49     | y        | NR                    | NR                       | To identify the most important echocardiographic parameters that predict medical ICU, hospital, and long-term mortality in patients with acute PE                                                                                   |
| <b>Zanobetti 2013</b> | NR     | 30d         | 120   | 73 (14)    | 43     | y        | NR                    | NR                       | To identify 1 or more ECG indices of RV anatomy and function predictors of short-term RV dysfunction in patients with PE                                                                                                            |
| <b>Ribeiro 1997</b>   | OBP    | In-hospital | 126   | NR         | 56     | Y        | NR                    | NR                       | the degree of RV systolic dysfunction, as assessed by ED at the time of diagnosis of PE, is a predictor of mortality rate during hospitalization and within 1 year.                                                                 |
| <b>Bahloul 2019</b>   | OBP    | In-hospital | 75    | 53 (18)    | 83     | y        | NR                    | NR                       | to evaluate the rate and the outcome of PE in the ICU                                                                                                                                                                               |

|                           |     |                     |     |            |    |    |      |     |                                                                                                                                                                                          |
|---------------------------|-----|---------------------|-----|------------|----|----|------|-----|------------------------------------------------------------------------------------------------------------------------------------------------------------------------------------------|
|                           |     | I                   |     |            |    |    |      |     |                                                                                                                                                                                          |
| <b>Grifoni<br/>2000</b>   | OBP | In-<br>hospita<br>I | 209 | 65<br>(15) | 60 | y  | 42.5 | >30 | To evaluate the prevalence and short-term prognosis of patients with objectively confirmed PE, normal blood pressure, and echocardiographic RV dysfunction                               |
| <b>Pruszczyk<br/>2020</b> | OBP | 30d                 | 490 | 64<br>(18) | 53 | no | NR   | NR  | to compare echocardiographic parameters for the prediction of adverse 30-day outcome in normotensive patients with acute pulmonary embolism, and to develop an optimal definition of RVD |

**Supplementary Table 7.** Adverse outcome definition across different studies included in the meta-analysis of RVD

| Study                 | Adverse outcome definition                                                                                                                                                                                                                                                                                                                                                                                                                                                                                                                              |
|-----------------------|---------------------------------------------------------------------------------------------------------------------------------------------------------------------------------------------------------------------------------------------------------------------------------------------------------------------------------------------------------------------------------------------------------------------------------------------------------------------------------------------------------------------------------------------------------|
| <b>Lankeit 2008</b>   | need for catecholamine administration (except for dopamine at a rate of 5 mg/kg/min or less) to maintain adequate tissue perfusion and prevent or treat cardiogenic shock, endotracheal intubation, or cardiopulmonary resuscitation                                                                                                                                                                                                                                                                                                                    |
| <b>Becattini 2013</b> | clinical worsening from a stable to an unstable hemodynamic condition that required at least one of the following: (1) IV catecholamine infusion to maintain adequate tissue perfusion and prevent or treat cardiogenic shock, (2) endotracheal intubation, or (3) CPR.                                                                                                                                                                                                                                                                                 |
| <b>Binder 2005</b>    | Not reported                                                                                                                                                                                                                                                                                                                                                                                                                                                                                                                                            |
| <b>Kaeberich 2015</b> | adverse 30-day outcome defined as pulmonary embolism-related death, need for mechanical ventilation, cardiopulmonary resuscitation, or catecholamine administration (except for dopamine at an infusion rate of $\leq 5 \mu\text{g}$ per kg of body weight per minute)                                                                                                                                                                                                                                                                                  |
| <b>Vanni 2009</b>     | composite of death for any cause and clinical deterioration (defined as progression to shock, mechanical ventilation, or cardiopulmonary resuscitation, or the need for infusion of a catecholamine, except for dopamine infused at a rate $\leq 5 \mu\text{g}/\text{kg}/\text{min}$ )                                                                                                                                                                                                                                                                  |
| <b>Dellas 2010</b>    | 1) need for catecholamine administration (except for dopamine at a rate of $\leq 5 \mu\text{g}/\text{kg}/\text{min}$ ) to maintain adequate tissue perfusion and prevent or treat cardiogenic shock; 2) endotracheal intubation; or 3) cardiopulmonary resuscitation                                                                                                                                                                                                                                                                                    |
| <b>Keller 2019</b>    | adverse outcome (primary study outcome) was defined as PE-related death, need for mechanical ventilation, cardiopulmonary resuscitation or administration of catecholamines (except for dopamine at an infusion rate of $\leq 5 \mu\text{g}/\text{kg}$ body weight/min)                                                                                                                                                                                                                                                                                 |
| <b>Lankeit 2010</b>   | (i) need for catecholamine administration (except for dopamine at a rate of $\leq 5 \text{mg}/\text{kg}/\text{min}$ ) to maintain adequate tissue perfusion and prevent or treat cardiogenic shock; (ii) endotracheal intubation; and (iii) cardiopulmonary resuscitation.                                                                                                                                                                                                                                                                              |
| <b>Weekes 2017</b>    | Signs of clinical deterioration after admission, including escalating ventilatory support, systolic blood pressure at or below 90 mm Hg, new dysrhythmia, the need for systemic or catheter-based thrombolysis, or advanced PE therapy such as embolectomy or extracorporeal membrane oxygenation                                                                                                                                                                                                                                                       |
| <b>Beigel 2019</b>    | any one of the following: 1. A drop in systolic blood pressure to $<90 \text{mmHg}$ for at least 15 min, or a drop of blood pressure of $>30 \text{mmHg}$ from baseline, accompanied by signs of end-organ hypoperfusion; 2. The need for vasopressor support to maintain adequate organ perfusion or blood pressure of $>90 \text{mmHg}$ ; 3. The need for cardiopulmonary resuscitation; 4. The need for mechanical ventilation; 5. The need for reperfusion (either by thrombolysis or surgical embolectomy) and 6. Mortality during hospitalization |
| <b>Taylor 2013</b>    | shock (systolic blood pressure persistently $<100 \text{mm Hg}$ refractory to volume loading and requiring vasopressors), respiratory failure requiring intubation, death, and recurrent venous thromboembolism (according to Kline et al.). Additionally, clinical deterioration as evidenced by transition to higher level of care (floor to stepdown, or stepdown to intensive care unit), and major bleeding during hospital admission were included as adverse outcomes.                                                                           |
| <b>Pruszczyk 2020</b> | at least one of the following: PE-related death, rescue thrombolysis, or hemodynamic collapse (which was defined as cardiopulmonary resuscitation; or systolic blood pressure $<90 \text{mm Hg}$ for at least 15 minutes with signs of end-organ hypoperfusion; or a need for intravenous catecholamine administration                                                                                                                                                                                                                                  |
| <b>Zhu 2007</b>       | defined as death or at least one of the following: need for vasoactive agents, endotracheal intubation, cardiopulmonary resuscitation                                                                                                                                                                                                                                                                                                                                                                                                                   |
| <b>Jimenez 2014</b>   | death from any cause, hemodynamic collapse, or adjudicated recurrent PE                                                                                                                                                                                                                                                                                                                                                                                                                                                                                 |
| <b>Gallotta 2008</b>  | development of hemodynamic instability, defined as systolic blood pressure $<90 \text{mm Hg}$ or a blood pressure drop $\geq 40 \text{mm Hg}$ for $\geq 15 \text{min}$ with signs of organ hypoperfusion not due to hypovolemia or sepsis; death due to shock or arrhythmias                                                                                                                                                                                                                                                                            |
| <b>Post 2009</b>      | Not reported                                                                                                                                                                                                                                                                                                                                                                                                                                                                                                                                            |

|                          |                                                                                                                                                                                                                                                                                                                                                                                                                                                                                                               |
|--------------------------|---------------------------------------------------------------------------------------------------------------------------------------------------------------------------------------------------------------------------------------------------------------------------------------------------------------------------------------------------------------------------------------------------------------------------------------------------------------------------------------------------------------|
| <b>Grifoni<br/>2000</b>  | Not reported                                                                                                                                                                                                                                                                                                                                                                                                                                                                                                  |
| <b>Logeart<br/>2006</b>  | In-hospital death or circulatory failure                                                                                                                                                                                                                                                                                                                                                                                                                                                                      |
| <b>Dudinski<br/>2016</b> | a composite of severe clinical deterioration occurring within 5 days of PE diagnosis, defined as: need for cardiopulmonary resuscitation or advanced cardiac life support, respiratory support with positive pressure ventilation or intubation and mechanical ventilation, hemodynamic support with inotropes and/or vasopressors, unstable dysrhythmia including ventricular tachycardia or ventricular fibrillation, or need for systemic or catheter-directed thrombolysis or surgical thromboembolectomy |
| <b>Ohigashi<br/>2010</b> | a composite of severe clinical deterioration occurring within 5 days of PE diagnosis, defined as: need for cardiopulmonary resuscitation or advanced cardiac life support, respiratory support with positive pressure ventilation or intubation and mechanical ventilation, hemodynamic support with inotropes and/or vasopressors, unstable dysrhythmia including ventricular tachycardia or ventricular fibrillation, or need for systemic or catheter-directed thrombolysis or surgical thromboembolectomy |

**Table 8** Risk of bias of RVD studies based on QUADAS2

| Study                | RISK OF BIAS      |            |                    |                 | APPLICABILITY CONCERNS |            |                    |
|----------------------|-------------------|------------|--------------------|-----------------|------------------------|------------|--------------------|
|                      | PATIENT SELECTION | INDEX TEST | REFERENCE STANDARD | FLOW AND TIMING | PATIENT SELECTION      | INDEX TEST | REFERENCE STANDARD |
| Grifoni 2000         | ⊕                 | ⊕          | ⊕                  | ⊕               | ⊕                      | ⊕          | ⊕                  |
| Ribeiro 1997         | ⊕                 | ⊕          | ⊕                  | ⊕               | ⊕                      | ⊕          | ⊕                  |
| Post 2009            | ⊕                 | ⊕          | ⊕                  | ?               | ⊕                      | ⊕          | ⊕                  |
| Becattini 2013       | ⊕                 | ?          | ?                  | ?               | ⊕                      | ?          | ?                  |
| Kruger 2004          | ⊕                 | ⊕          | ⊕                  | ⊕               | ⊕                      | ⊕          | ⊕                  |
| Jiménez 2011         | ⊕                 | ⊕          | ⊕                  | ⊕               | ⊕                      | ⊕          | ⊕                  |
| George 2014          | ⊕                 | ⊕          | ⊕                  | ?               | ⊕                      | ⊕          | ⊕                  |
| Zhu 2008             | ?                 | ⊕          | ⊕                  | ⊕               | ⊕                      | ⊕          | ⊕                  |
| Dellas 2010          | ⊕                 | ⊕          | ?                  | ?               | ⊕                      | ?          | ?                  |
| Kaerberich 2015      | ⊕                 | ?          | ?                  | ?               | ⊕                      | ⊕          | ⊕                  |
| Becattini 2011       | ⊕                 | ⊕          | ⊕                  | ⊕               | ⊕                      | ⊕          | ⊕                  |
| Vanni 2011           | ⊕                 | ⊕          | ⊕                  | ⊕               | ⊕                      | ⊕          | ⊕                  |
| Vanni 2015           | ⊕                 | ⊕          | ⊕                  | ⊕               | ⊕                      | ⊕          | ⊕                  |
| Vanni 2009           | ⊕                 | ?          | ?                  | ?               | ⊕                      | ?          | ?                  |
| Bahloul 2019         | ⊕                 | ⊕          | ⊕                  | ?               | ?                      | ⊕          | ⊕                  |
| Ozsu 2010            | ⊕                 | ⊕          | ⊕                  | ?               | ⊕                      | ⊕          | ⊕                  |
| Keller 2019          | ⊕                 | ⊕          | ⊕                  | ⊕               | ⊕                      | ?          | ?                  |
| Beigel 2019          | ⊕                 | ⊕          | ⊕                  | ⊕               | ⊕                      | ⊕          | ?                  |
| Kumamaru 2016        | ⊕                 | ⊕          | ⊕                  | ⊕               | ⊕                      | ⊕          | ⊕                  |
| Taylor 2013          | ⊕                 | ⊕          | ⊕                  | ⊕               | ⊕                      | ⊕          | ⊕                  |
| Dudzinski 2016       | ?                 | ⊕          | ⊕                  | ⊕               | ?                      | ⊕          | ⊕                  |
| Lankeit 2010         | ⊕                 | ?          | ?                  | ⊕               | ⊕                      | ⊕          | ⊕                  |
| Weekes 2017          | ⊕                 | ⊕          | ⊕                  | ⊕               | ⊕                      | ⊕          | ⊕                  |
| Lankeit 2008         | ⊕                 | ⊕          | ?                  | ⊕               | ⊕                      | ⊕          | ⊕                  |
| Ohigashi 2010        | ⊕                 | ⊕          | ⊕                  | ⊕               | ⊕                      | ⊕          | ⊕                  |
| Zhu 2007             | ⊕                 | ?          | ?                  | ?               | ⊕                      | ?          | ?                  |
| Binder 2005          | ⊕                 | ⊕          | ⊕                  | ⊕               | ⊕                      | ⊕          | ⊕                  |
| Kukla 2015           | ⊕                 | ?          | ?                  | ?               | ⊕                      | ?          | ?                  |
| Witkin 2019          | ⊕                 | ?          | ?                  | ⊕               | ⊕                      | ?          | ⊕                  |
| Vanni 2017           | ⊕                 | ⊕          | ?                  | ⊕               | ⊕                      | ⊕          | ⊕                  |
| Palmieri 2008        | ⊕                 | ?          | ⊕                  | ⊕               | ⊕                      | ?          | ⊕                  |
| Kostrubiec 2005      | ⊕                 | ⊕          | ⊕                  | ⊕               | ⊕                      | ⊕          | ⊕                  |
| Pieralli 2006        | ⊕                 | ⊕          | ⊕                  | ?               | ⊕                      | ⊕          | ⊕                  |
| Vieillard-Baron 2001 | ⊕                 | ?          | ?                  | ⊕               | ⊕                      | ?          | ⊕                  |
| Barrios 2016         | ?                 | ?          | ?                  | ⊕               | ?                      | ?          | ?                  |
| Yalamanchili 2004    | ⊕                 | ⊕          | ⊕                  | ?               | ⊕                      | ⊕          | ⊕                  |
| Logeart 2006         | ⊕                 | ⊕          | ⊕                  | ⊕               | ⊕                      | ⊕          | ⊕                  |
| Gallotta 2008        | ⊕                 | ?          | ⊕                  | ?               | ⊕                      | ?          | ⊕                  |

Pruszczyk 2020

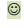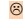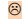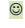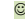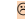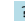

Jimenez 2014

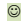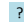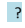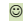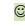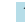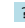

**Table 9** Risk of bias of individual parameters of RV overload based on QUADAS2

| Study           | RISK OF BIAS      |            |                    |                 | APPLICABILITY CONCERNS |            |                    |
|-----------------|-------------------|------------|--------------------|-----------------|------------------------|------------|--------------------|
|                 | PATIENT SELECTION | INDEX TEST | REFERENCE STANDARD | FLOW AND TIMING | PATIENT SELECTION      | INDEX TEST | REFERENCE STANDARD |
| Lobo 2014       |                   |            |                    |                 |                        |            |                    |
| Dahhan 2016     |                   |            |                    |                 |                        |            |                    |
| Ciurzyński2018  |                   |            |                    |                 |                        |            |                    |
| Paczyńska 2015  |                   |            |                    |                 |                        |            |                    |
| Frémont 2008    |                   |            |                    |                 |                        |            |                    |
| Khemasuwan 2015 |                   |            |                    |                 |                        |            |                    |
| Pruszczyk 2014  |                   |            |                    |                 |                        |            |                    |
| Stein 2010      |                   |            |                    |                 |                        |            |                    |
| Yuriditsky 2019 |                   |            |                    |                 |                        |            |                    |
| Zanobetti 2013  |                   |            |                    |                 |                        |            |                    |
| Tatlisu 2017    |                   |            |                    |                 |                        |            |                    |
| Kanar 2019      |                   |            |                    |                 |                        |            |                    |
| Kucher 2005     |                   |            |                    |                 |                        |            |                    |
| Carroll 2018    |                   |            |                    |                 |                        |            |                    |
| Bikdeli 2018    |                   |            |                    |                 |                        |            |                    |
| Park 2012       |                   |            |                    |                 |                        |            |                    |

**Figure 1A.** Meta-analysis on the association between RVD and death by number of criteria used for the definition of RVD

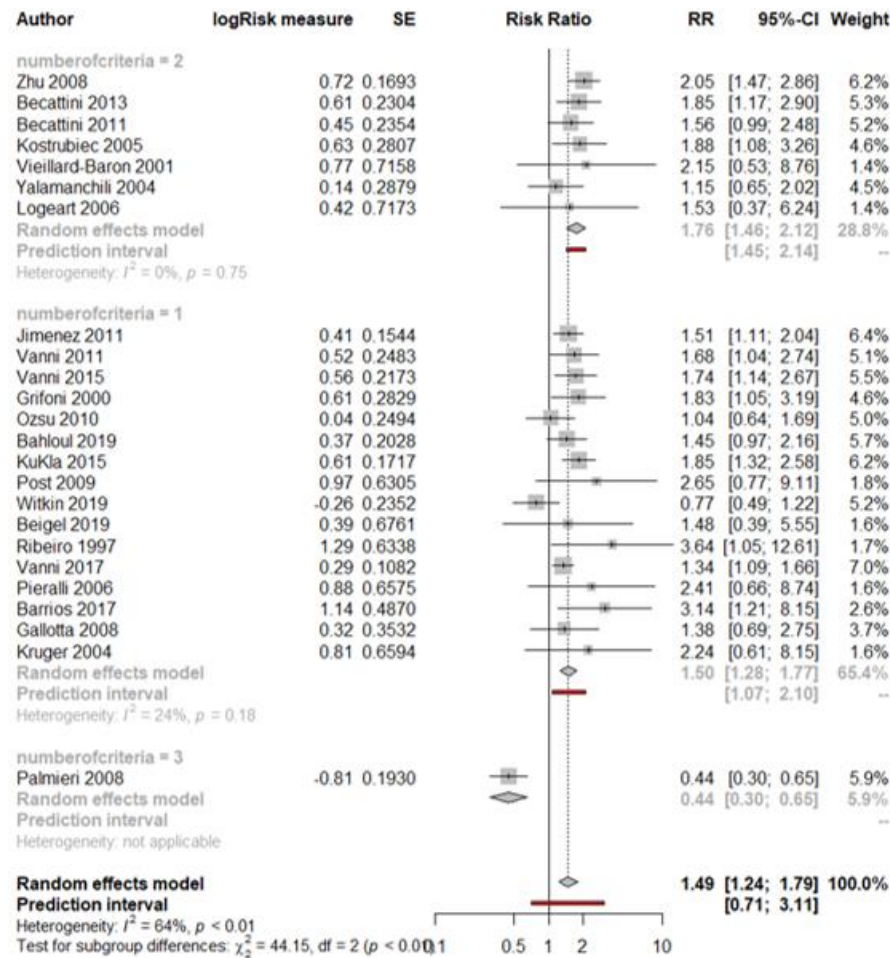

**Figure 1B.** Sensitivity analysis for RVD studies for hemodynamic stable patients

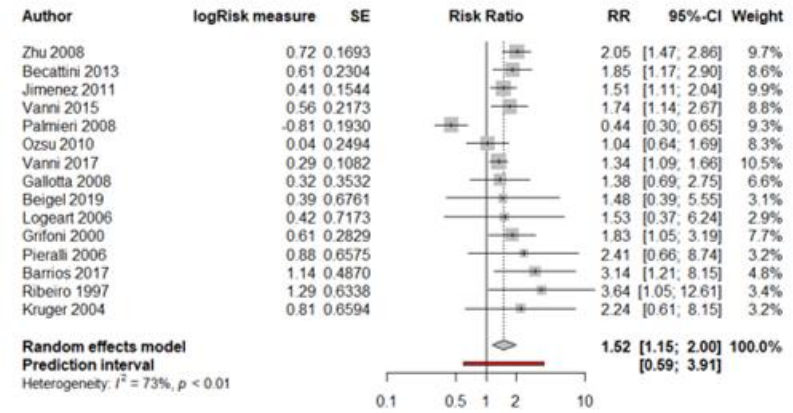

**Figure 2A.** Meta-analysis on the association between RVD and PE-related death

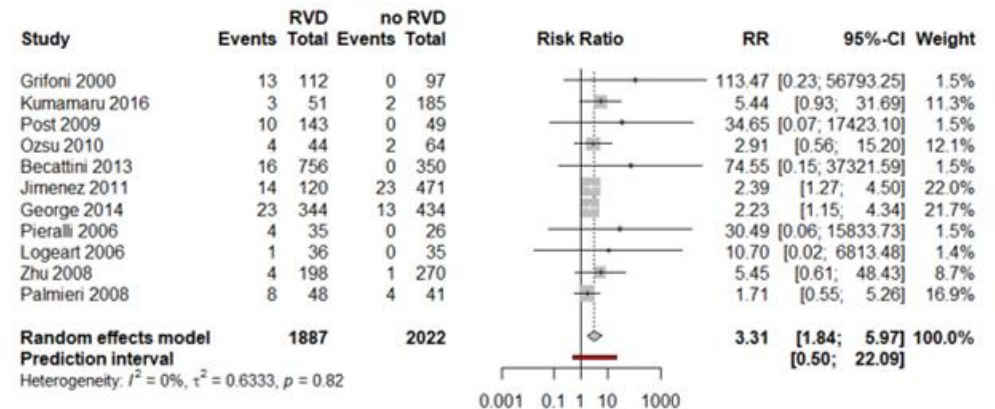



**Figure 2B** Meta-analysis on the association between RVD and PE-related death in hemodynamically stable patients.

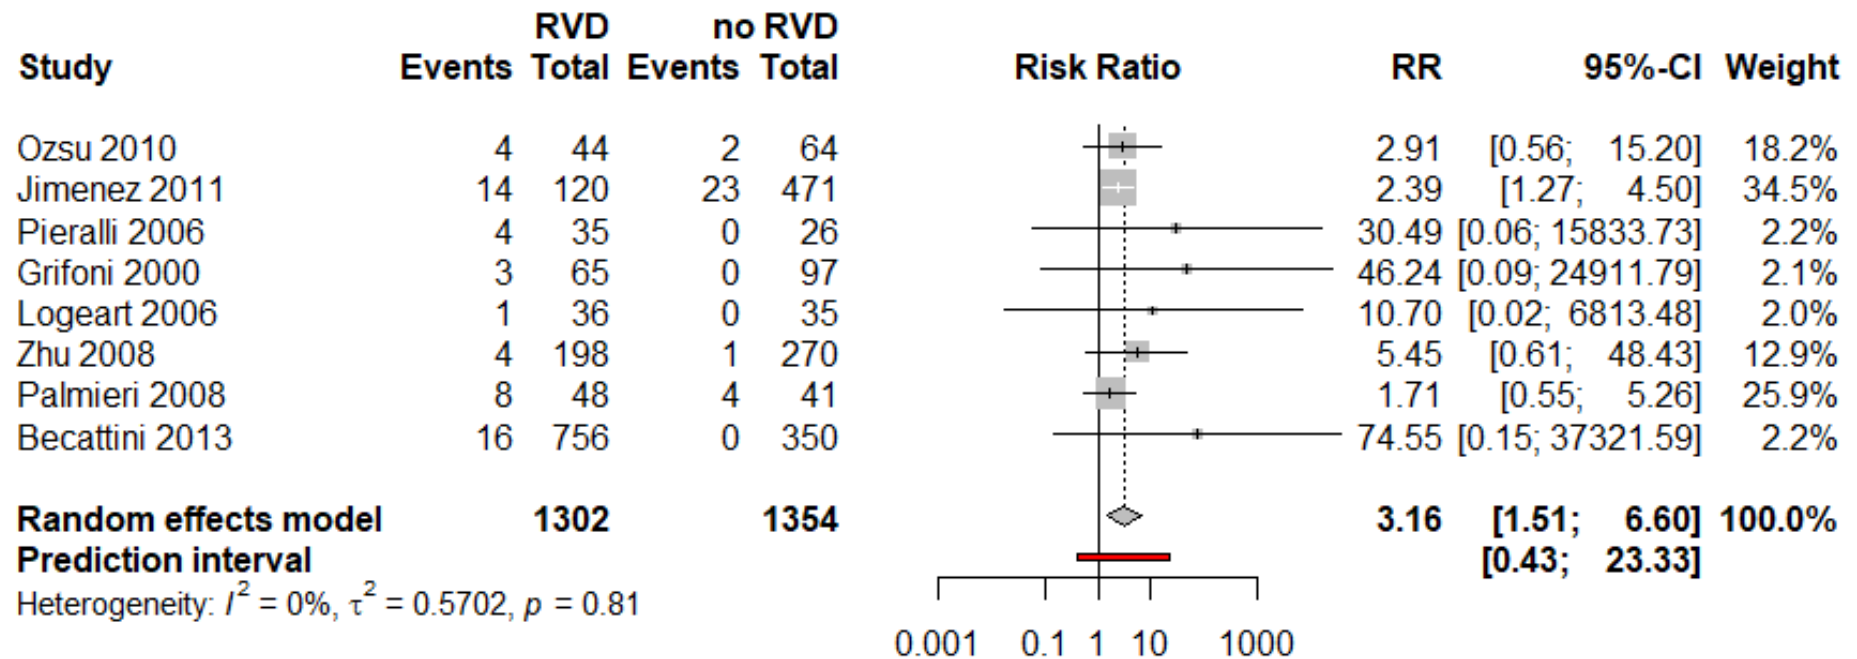

**Figure 3** Meta-analysis on the association between RVD and adverse outcome.

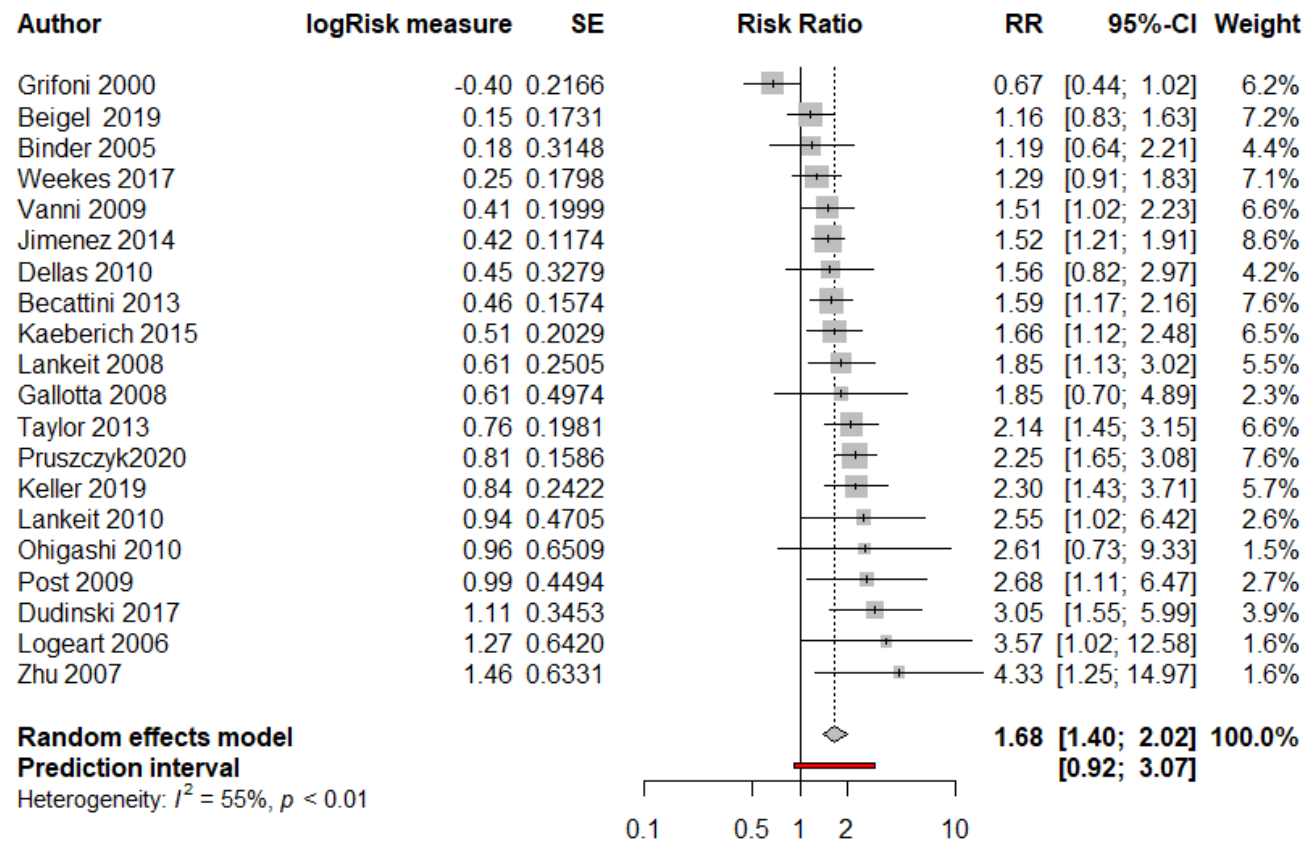

**Figure 4.** Meta-analysis on the association between RV/LV and death

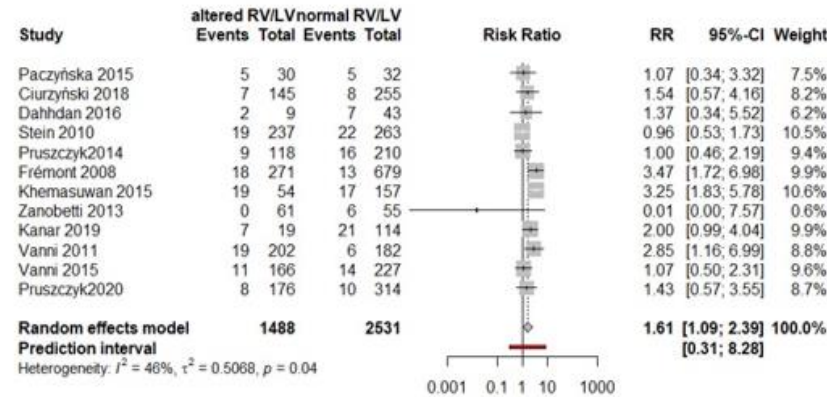

**Figure 5A.** Sensitivity analyses on the association between RV/LV ratio and death in studies that excluded hemodynamically unstable patients.

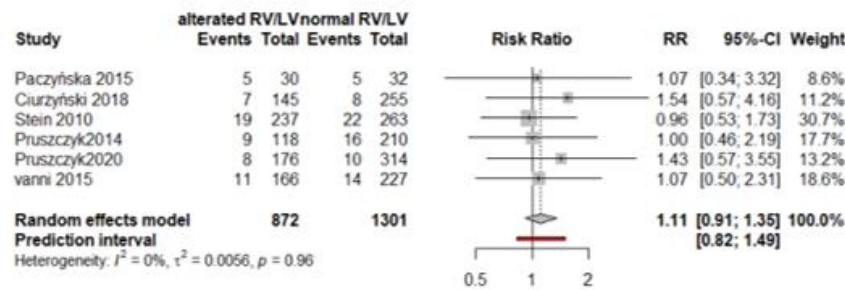

**Figure 5B.** Sensitivity analysis on the association between RV/LV ratio and death according to different cut-offs.

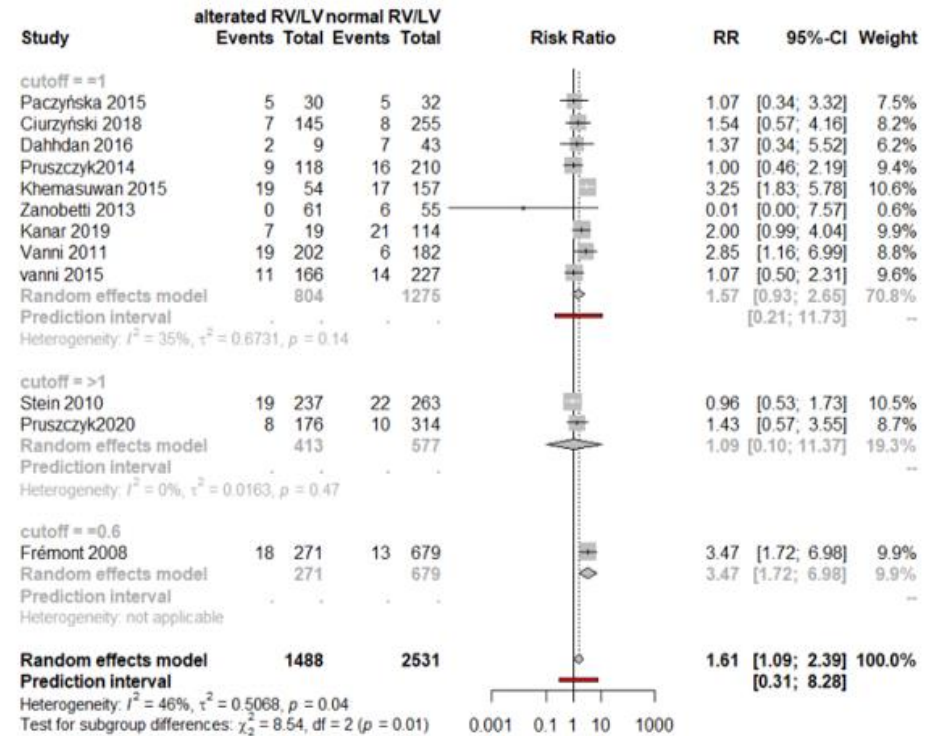

**Figure 6** Meta-analysis on the association between TAPSE and death. For one study, the derivation and validation cohorts were analyzed separately [66].

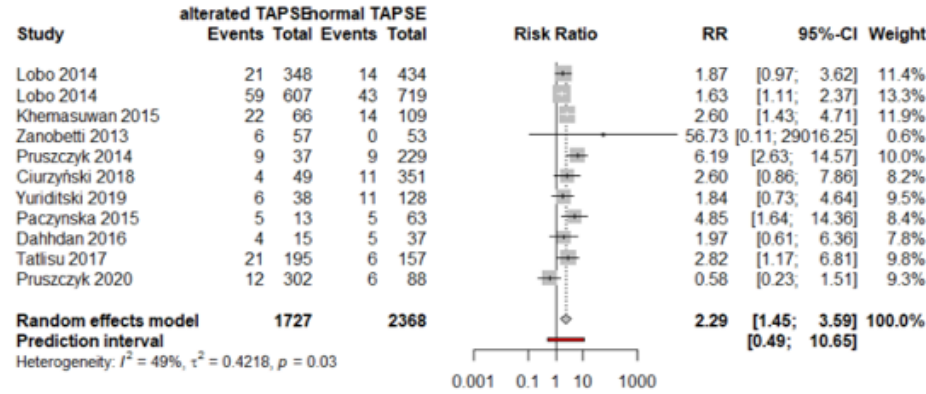

**Figure 7B.** Sensitivity analysis on the association between TAPSE and death in studies only including hemodynamically stable patients.

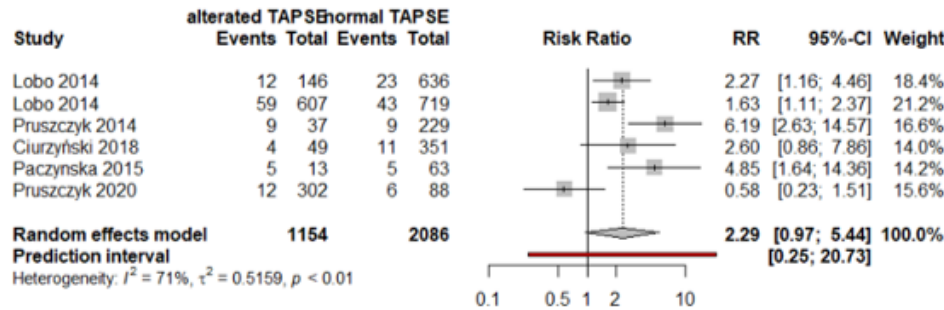

**Figure 7A.** Sensitivity analysis on the association between TAPSE and death according to different cut-offs.

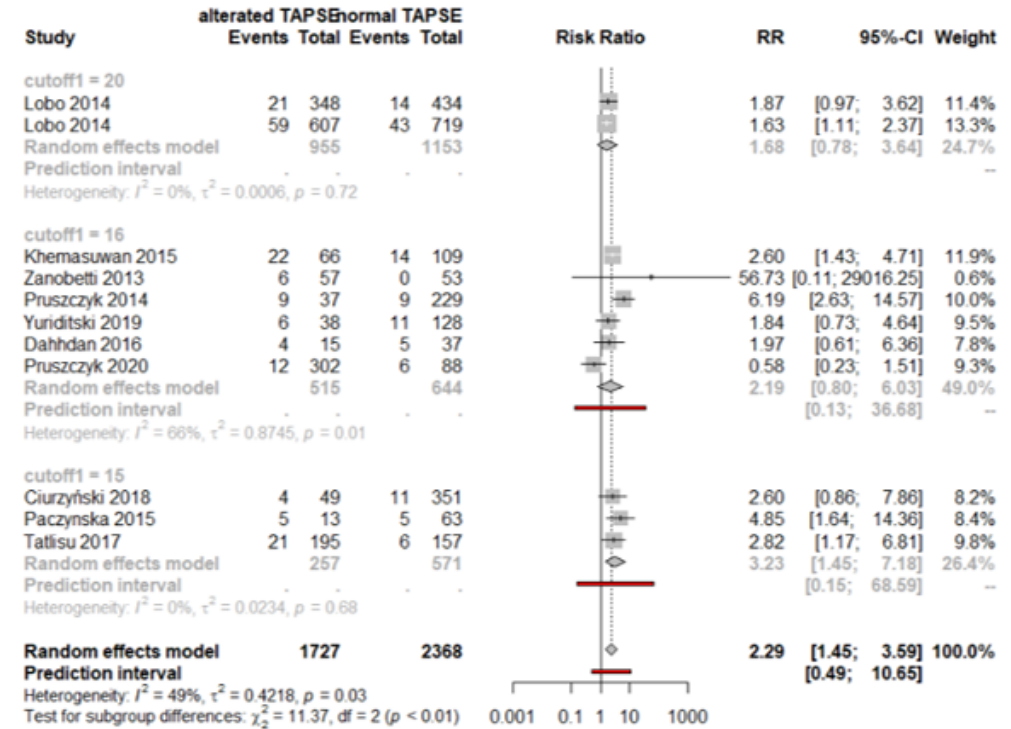

**Figure 7C.** Sensitivity analysis on the association between TAPSE and PE-related death in hemodynamically stable patients

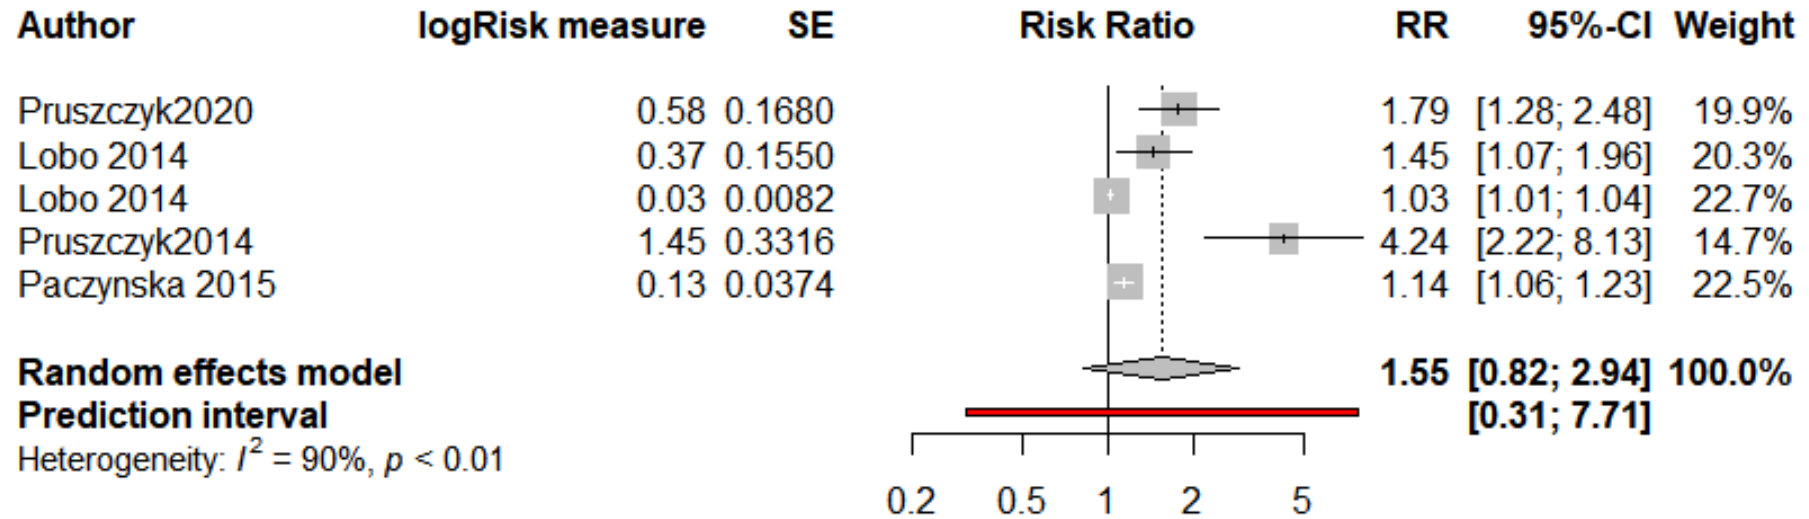

**Figure 8.** Meta-analysis on the association between hypokinesia and adverse outcome in the short-term

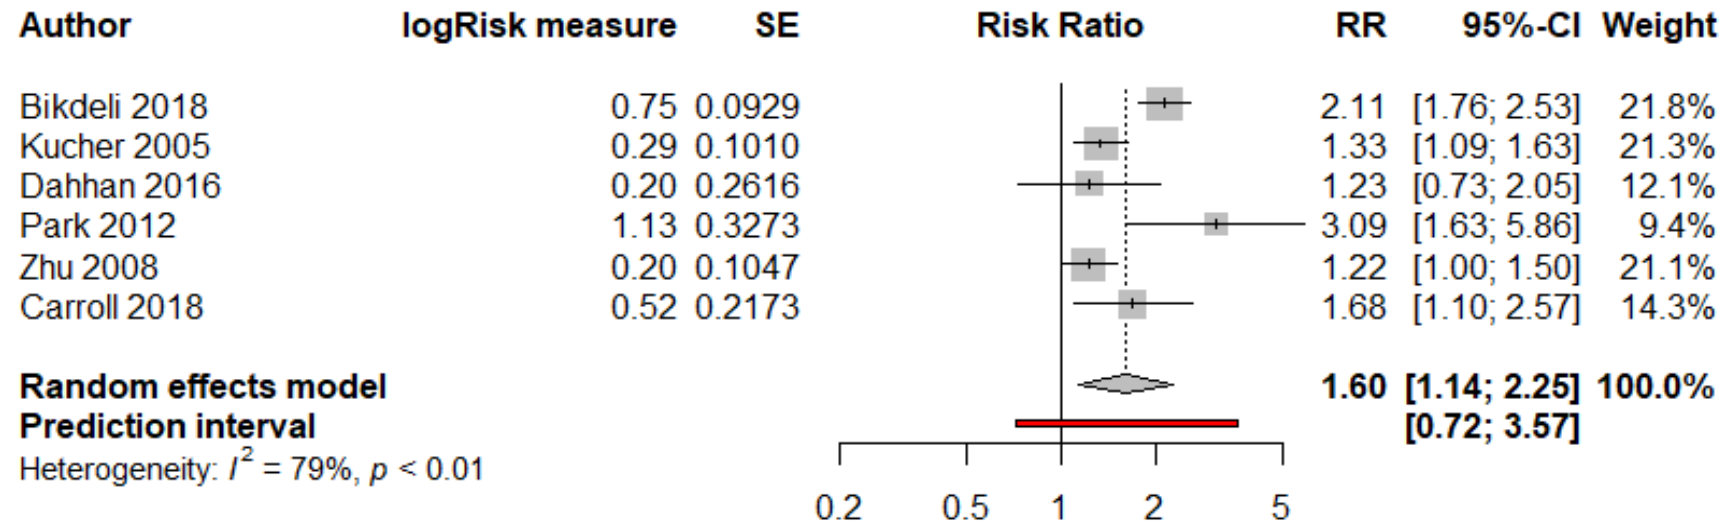

**Figure 9.** Meta-analysis on the Mean difference of RV diameter in survivors and non survivors

| Study                                                        | Experimental |       | Control    |       | Standardised Mean Difference | SMD         | 95%-CI               | Weight        |       |
|--------------------------------------------------------------|--------------|-------|------------|-------|------------------------------|-------------|----------------------|---------------|-------|
|                                                              | Total        | Mean  | SD         | Total |                              |             |                      |               | Mean  |
| Paczyńska 2015                                               | 8            | 41.60 | 8.9000     | 68    | 37.50                        | 7.0000      | 0.56                 | [-0.17; 1.30] | 16.4% |
| Khemasuwan 2015                                              | 82           | 40.00 | 9.0000     | 82    | 37.00                        | 9.0000      | 0.33                 | [0.02; 0.64]  | 27.2% |
| Zanobetti 2013                                               | 6            | 29.00 | 7.0000     | 115   | 27.00                        | 6.0000      | 0.33                 | [-0.49; 1.15] | 14.7% |
| Ribeiro 1997                                                 | 10           | 40.00 | 4.0000     | 116   | 31.00                        | 6.0000      | 1.52                 | [0.85; 2.20]  | 17.8% |
| Pruszczuk 2014                                               | 21           | 39.00 | 10.0000    | 390   | 36.00                        | 9.5000      | 0.31                 | [-0.13; 0.75] | 23.8% |
| <b>Random effects model</b>                                  | <b>127</b>   |       | <b>771</b> |       |                              | <b>0.58</b> | <b>[-0.05; 1.20]</b> | <b>100.0%</b> |       |
| Heterogeneity: $I^2 = 63\%$ , $\tau^2 = 0.1529$ , $p = 0.03$ |              |       |            |       |                              |             |                      |               |       |

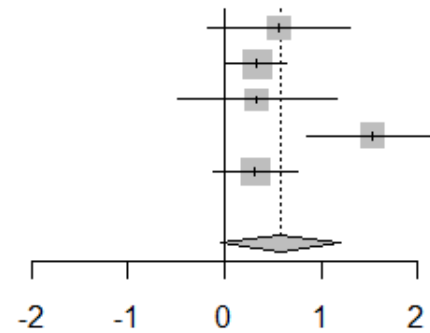

Supplement: inline-supplementary-material-1 [file inline-supplementary-material-1.pdf]
